# Supplementary material
Source: PubMed Central journal article supplement (PMC2898299)
Supplement: supp_M110.118489_jbc.M110.118489-1.pdf [file supp_M110.118489_jbc.M110.118489-1.pdf]

```

hENT1      1  -----**-----MTTSHOPODRYKAVWLI---FFMIGLGTLIPWNFFMTATOFFTNRIDMSONVSLVTAELSKDAQASAPAPAPLPERNSLSAI
hENT3      1  MAVVSEDDFQHSSNSTYRTTSSLRADOEALLEKLLDRPPPGLORPEDRFCGTYII--FFSLGIGSLLPWNFFITAKEYWMFKLRNSS-----SPATGEDPEGSDLINY
PfNT2      1  ---MSNSNSKEHYRMDGITENKIINEDESLLNMKKEEIILNGKFEEEPKLDTEN--KIDIEEKNNMSEFTNIFPNITLCMGMSS-----VLMYNCVLNTTPHIHAL
PfNT1      1  -----MSTGKESSKAVADIESRGDYRDDGKKGSTLSSKQHFMLSLTFILIGLSS-----INV

hENT1      80  FNNVMTLCAMLPLLLFTYLNSFLHORIPOSVRILGSLVAILL--VELITALVKVQLDALP--FFVITMIKIVLINSFGAILOGSLFGLAGLLPASYTAPIMSG--OGLAGFFASVAMI
hENT3     103  FESYTAVASTVPSMLCLVANFLLVNRVAVHIRVLASLTVILA--IFMVITALVKVDTFSWTRGFFAVHIVCMVILSGASTVFSSIYGMTGSFPMRNSQALISG--GAMGGTVSAVASL
PfNT2     101  LNKNIVVSSTFLLYFSILVIVSLLSLFIEVRTRTYDVCFIL--SFILQMIYPFIKYFVDK--TVFFYVLVALIGATCSMMRTMIFSISSIVNDSKVICLSYGLTGIYSLFITSTFFY
PfNT1     53  WNTALGLNINFKYNTQITGLVCSSIVALFVEPKIMLFFLLGLSILCAGFOISHSFFDTQFDTYCLVARIVIGVVAGLAOTIAFNIGSTMEDNMGGMSAGIGISGVPIFVINLLD

hENT1     193  CALASGSELSESAFGYFIT--ACAVILLTICYLGLP-----RLEFYRYYQOLKEGPGEQETKLDLISKGEEPRAGKESGVSVS-----N
hENT3     218  VDLAASSDVRNSALAFFLT--ATIFLVLCMGLVLLLS-----RLEYARYYMRPVLAAH-----VFSGEELPQDSLAPSVA-----S
PfNT2     217  FVRINKDIQKLMLSLFITSATNCIFILVSFLCYTVLKRTNNFKEKFIYTEERKNNKNSRDDSVRYYESITEKKSONISYPININSIYESKTENTESKYSLTKNDSNSVGIKSSNNT
PfNT1     173  QFVSPEKHYGVNKAKLLYLYIICELCLLLAVFCVCN-----LDLITNKNNKKDENKENNATLS-----

hENT1     273  SOPNESHSIKAILKNISVLASVCFIFTITIGMFPAVTVEVKSLAGSS--TWERYFIP-----VSCFLTFN-----IFDWLGRSLTAVFMWP--GKDSRWLPSIVLARLVFV
hENT3     289  RFIDSHTPPLRPILKTASLGRCVTYVFFITSLIYPAVCTNIESLNKGSGSLWTTKFFIP-----LTTFLYN-----FADLCGROLTAWIQVP--GPNSKALPGFVLLRTCLI
PfNT2     337  NNMTSNEIGDHKILOESHSKNKKFNDILLNENKTLSLTHSKKEDNIDDENKNHKNOFFLFNINKNLIKQAKIKAFLYKKSFIFLCSFYNIFLKLLFP--VVCPEMWTNNVDERYILI
PfNT1     232  -----YMELFKDSYKAILTMFLVNWLLQLEFPGVG--HKKWOESHNISDYNVTIHVG-----MFQVED-----LSRYPPNLTHKIFKNFTFSLNKLLVANSLRLLFI

hENT1     373  PLLLLCNIKIPRRYLT-----VVFEHDAWF--IFFMAAFAFS-----NGYLASLCMCFGPRKVKPAEAETAGAIMAFF--LCLGLALGAVF
hENT3     391  PLFVLCNYOPRVHLKT-----VVFQSDVYP--ALLSSLLGLS-----NGYLSTLALLYGPKIVPRELAEATGVVMSFY--VCLGLTLGSAC
PfNT2     455  GIVQFADCISRVFPSLAGTFPVFKIFLLTQKRVLIYSLRTILSVIGLIIPLTQDTFINNFLFKCALIFLNIYLNGWFVIMSFINVPELLKPINSMSNVATVSSFGSTLLRVGLLTGYGC
PfNT1     324  PWFILNACVDHPFFKN-----IVQQCVCMAMLAFT-----NGWFNTVPFLVFVKELKKAKKKEIEISTFLVIAMFVGLFCGIWT

hENT1     449  SFLFRAIV-----
hENT3     468  STLLVHLI-----
PfNT2     575  STLYKYLISKM-----
PfNT1     400  TYIVNLFNIVLPKPDLPPIDVTQ

```

**Supplementary Fig. 1:** Sequence alignment of PfNT2 with *Plasmodium falciparum* PfNT1, human purine transporters hENT1 and hENT3. Identical amino acids are highlighted in black boxes, and similar residues are highlighted in grey boxes; hyphens indicate gaps. A dileucine motif in the PfNT2 amino terminal domain similar to that responsible for intracellular localization in hENT3 is indicated by (\*\*).

**Supplementary Table 1**  
 Primers used for the construction of codon optimised *PfN72<sub>coo</sub>*.

| Primer Name | Sequence                                                                 |
|-------------|--------------------------------------------------------------------------|
| 1           | sens ATG AGC AAT TCT AAC AGC AAG GAG CAC TAC AGA ATG GAC GGA ATC ACA     |
| 2           | antisens TTCATTGATGATCTGTTTTCTGTGATCCGTCATTCTGTAGTGCTC                   |
| 3           | sens GAA AAC AAG ATC ATC AAT GAA GAT GAT GAA AGT CTC TTG AAC ATG AAG     |
| 4           | antisens ATTCAAGATGATTCTCTCTCTCATGTTCAAGAGACTTTCATCATC                   |
| 5           | sens AAG GAA GAA ATC ATC TTG AAT GGA AAA TTC GAA GAA GAG CCA AAG CTT     |
| 6           | antisens AAG GAA GAA ATC ATC TTG AAT GGA AAA TTC GAA GAA GAG CCA AAG CTT |
| 7           | sens GAT CTG ACC GAA AAC AAG ATC GAT ATC GAA GAG AAG AAC AAC AAC ATG     |
| 8           | antisens GAAGATGTTTGGAACCTCACTCATGTTGTTGTTCTCTCTCGATATC                  |
| 9           | sens AGT GAG TTC ACA AAC ATC TTC CCA AAC ATC ACA CTG TGT CTG ATG GGA     |
| 10          | antisens GTACATTAGTACAGATGACATTCATCAGACACAGTGTGATGTTTGG                  |
| 11          | sens ATG TCA TCT GTA CTA ATG TAC AAC TGC GTA CTG AAC ACA ACA CCT CAT     |
| 12          | antisens CTGTTCAGCAGTGCATGGATAGGGTGTGTGTTTCAGTACGCGATT                   |
| 13          | sens ATC CAT GCA CTG CTG AAC AAG AAC ATC GTA GTA TCT TCA ACC TTC TTC     |
| 14          | antisens AACCCAGATAGAGAAGTATAGGAAGAAGGTTGAAGATACTACGATGTT                |
| 15          | sens CTA TAC TTC TCT ATC CTG GTT ATC GTA TCA TTG TTA AGT TCC CTA TTC     |
| 16          | antisens TGTCTTGTCTTACCTCGATGAATAGGGAACCTAACAAATGATACGAT                 |
| 17          | sens ATC GAG GTA AAG ACA AGA ACA TAC GAT GTG TGT TTC ATC CTA TCA TTC     |
| 18          | antisens TGGGTATATCATTTGTAGGATGAATGATAGGATGAAACACACATCGTA                |
| 19          | sens ATCCTACAAATGATATACCCATTCATCATCAAGTACTTCTACGATAAG                    |
| 20          | antisens TAGTACGTAGAAGAAAACGGTCTTATCGTAGAAGTACTTGATGATGAA                |
| 21          | sens ACC GTT TTC TTC TAC GTA CTA GTA GCA CTA ATC GGT GCT ACG TGC TCT     |
| 22          | antisens GAATATCATGGTCTTCATCATAGAGCAGTGCACCGGATTAGTGCTAC                 |
| 23          | sens ATG ATG AAG ACC ATG ATA TTC TCC ATC TCT TCC ATC GTT GTA AAC GAT     |
| 24          | antisens TGATAGACAGATAACCTTTGAATCGTTTACAACGATGGAAAGAGATGGA               |
| 25          | sens TCA AAG GTT ATC TGT CTA TCA TAC GGT TTG ACT GGG ATC TAC TCT CTA     |
| 26          | antisens GAAGAATGTGGATGTGATGAATAGAGAGTAGATCCAGTCAAACCGT                  |
| 27          | sens TTC ATC ACA TCC ACA TTC TTC TAC TTC GTT ATT AAG ATC AAC AAG GAT     |
| 28          | antisens TGACAGCATCACTTTGGATATCCTGTGTGATCTTAATAACGAAGTA                  |
| 29          | sens ATC CAA AAG TTG ATG CTG TCA CTG TTC ATC ACA TCA GCC ATC AAC TGT     |
| 30          | antisens GAAAGACACTAGGATGAAGATACAGTGTGATGGCTGATGTGATGAACAG               |
| 31          | sens ATC TTC ATC CTA GTG TCT TTC CTA TGT TAC ACT GTA CTA AAG AGA ACA     |
| 32          | antisens GAACTTTTCTTGAAGTTGTTGTTCTTTAGTACAGTGAACATAG                     |
| 33          | sens AAC AAC TTC AAG GAA AAG TTC AAG ATC TAC ACA GAA GAG AGA AAG AAC     |
| 34          | antisens ATCATCACGTGAGTCTTGTGTCTTCTCTCTCTGTGTGATCTT                      |
| 35          | sens AAC AAG AAC TCA CGT GAT GAT TCT TAC AAG TAC TAC GAA AGT ATC ACT     |
| 36          | antisens GATGTTTTGTGACTTCTTTTCAGTGATATTTCTGTAGTACTTGTAAAGA               |
| 37          | sens GAA AAG AAG TCA CAA AAC ATC TCA TAC CCA ATC AAC ATC AAC AGT ATC     |
| 38          | antisens TTCTGTCTTACTTTCTGATGATGACTGTTGATGTTGATTGGGATGA                  |
| 39          | sens ATC TAC GAA AGT AAG ACA GAA AAC ACG GAA TCC AAG TAC TCA CTA ACA     |
| 40          | antisens AACTGAGTTAGAATCGTTCTTTGTTAGTGTGACTTGGATTCCGTGTT                 |
| 41          | sens AAG AAC GAT TCT AAC TCA GTT GGT ATC AAG AGT AGT AGT AAC AAC ACT     |
| 42          | antisens TTCGTTACTAGTCACTGTGTTAGTGTGTTACTACTACTCTTGATACC                 |
| 43          | sens AAC AAC ATG ACT AGT AAC GAA ATC GGA GAT CAT AAG ATC CTA CAA GAA     |
| 44          | antisens CTCTTGTCTTTGAATGAGATCTTGTAGGATCTTATGATCTCCGAT                   |
| 45          | sens TCT CAT TCA AAG AAC AAG AAG TTC AAC GAC ATC CTT CTT AAC GAA AAC     |
| 46          | antisens ATGAGTAAGTGATAGTGTCTTGTTTTCGTTAAGAAGGATGTCGTTGAA                |
| 47          | sens AAG ACA CTA TCA CTT ACT CAT AGT AAG AAG GAA GAT AAC ATC GAT GAC     |
| 48          | antisens GTTCTTATGGTCTTGTTTTCGTCATCGATGTTACTTCTCTTACT                    |
| 49          | sens GAA AAC AAG AAC CAT AAG AAC CAA TTC TTC CTA TTC AAC ATC AAC AAG     |
| 50          | antisens GGCTTGCTTGATCAGGTTCTTCTTGTGATGTTGAATGGAAGAATTG                  |
| 51          | sens AAG AAC CTG ATC AAG CAA GCC AAG ATC AAG GCA TTC CTG TAC AAG AAG     |
| 52          | antisens ACAGAATAGGAAGATGAACGACTTCTTGTACAGGAATGCCCTTGATCTT               |
| 53          | sens TCG TTC ATC TTC CTA TTC TGT AGC TTC TAC AAC ATC TTC CTC AAG ATC     |
| 54          | antisens ACAAAACCCGGGAACAGCAGGATCTTGAGGAAGATGTTGAGAAGCT                  |
| 55          | sens CTG CTG TTC CCG GTT GTT TGT CCA GAA ATG TGG ACT AAC AAC GTT GAT     |
| 56          | antisens TCCGATTAGGATGATCTTTCATCAACGTTGTTAGTCCACATTTCTGG                 |
| 57          | sens GAA AGA TAC ATC CTA ATC GGA ATC GTG CAA TTC GCT GAT TGT ATC AGT     |
| 58          | antisens TGCAAGGGATGGGAAAACACGACTGATACAATCAGCGAATTGCACGAT                |
| 59          | sens CGT GTT TTC CCA TCC CTT GCA GGA ACA TTC CCA GTA TTC AAG ATC TTC     |
| 60          | antisens TACCTTCTTTGTGTCAAGAGGAAGATCTGAATACTGGGAATGTTCC                  |
| 61          | sens CTC TTG ACA CAA AAG AAG GTA TTA ATT TAC TCT CTA CTG AGA ACT ATC     |
| 62          | antisens GATCAATCCGATTACAGACAGGATAGTTCTCAGTAGAGAGTAAATTA                 |
| 63          | sens CTG TCT GTA ATC GGA TTG ATC ATC CCA CTG ACA CAA GAT ACA TTC ATC     |
| 64          | antisens ACACTTGAAAAGGAAGTTGTTGATGATGATCTTGTGTGATGAGGGAT                 |
| 65          | sens AAC AAC TTC CTT TTC AAG TGT GCA CTC ATC TTC CTG AAC ATC TAC CTG     |
| 66          | antisens CATGATAACGAACCAACCGTTTCAGGTAGATGTTGAGGAAGATGAGTGC               |
| 67          | sens AAC GGT TGG TTC GTT ATC ATG TCT TTC ATT AAC GTT CCA GAA ATC CTC     |
| 68          | antisens ACTCATGAGTTGATAGGCTTGAGGATTTCTGGAACGTTAATGAAAGA                 |
| 69          | sens AAG CCT ATC AAC TCA ATG AGT AAC GTT GCA ATC GTT AGT AGT TTC GGT     |
| 70          | antisens GCCAACTCGAAGGAGTGTGAACCGAACTACTAACGATTGCAACGTT                  |
| 71          | sens TCA ACA CTC CTT CGA GTT GGC TTG CTG ACA GGC TAC GGA                 |
| 72          | antisens CATCTTTGAGATGATGACTTGTATAGTGTGGAACATCCGTAGCTGTCAGCAA            |
| 73          | sens TGT TCC ACA CTA TAC AAG TAC ATC ATC TCA AAG ATG                     |
